# Supplementary material
Source: Elsevier journal article supplement (https://www.sciencedirect.com/science/article/pii/S0213911112002567)
Supplement: mmc1 [file S0213911112002567:mmc1.doc]

**Apéndice. Material adicional**

**Resultados de la revisión de la evidencia publicada sobre las relaciones entre el entorno construido y la salud**

Atkinson R. The hidden costs of gentrification: displacement in Central London. Journal of Housing and the Built Environment. 2000;15:307-26.

- Atkinson R. Does gentrification help or harm urban neighbourhoods? An assessment of the evidence-base in the context of the new urban agenda. Glasgow, University of Glasgow Department of Urban Studies, (CNR Paper 5). Centre for Neighbourhood Research; 2002.

Biggeri A, Bellini P, Terracini B, et al. Meta-analysis of the Italian studies on short-term effects of air pollution. Epidemiol Prev. 2001; 25:1-71.

- Blackwell TH, Kaufman JS. response time effectiveness: comparison of response time and survival in an urban emergency medical services system. Acad Emerg Med. 2002;9:288-95.
- Bornehag CG, Blomquist G, Gyntelberg F, et al. Dampness in buildings and health. Nordic interdisciplinary review of the scientific evidence on associations between exposure to "dampness" in buildings and health effects (NORDDAMP). Indoor Air. 2001;11:72-86.
- CABE 2003 The value of good design: how buildings and spaces create economic and social value. (Consultado el 2/2/2012.) Disponible en: http://www.shapingourplaces.co.nz/wp-content/uploads/2009/11/ValueOfGoodDesign.pdf

Clark C, Myron R, Stansfeld S, et al. A systematic review of the evidence on the effect of the built and physical environment on mental health. Journal of Public Mental Health. 2007;6:14-27.

- Dalgard OS, Lund Håheim L. Psychosocial risk factors and mortality: a prospective study with special focus on social support, social participation, and locus of control in Norway. J Epidemiol Community Health. 1998;52:476-81.

DeSalvo KB, [Bloser N](http://www.ncbi.nlm.nih.gov/pubmed?term="Bloser N"%5BAuthor%5D), [Reynolds K](http://www.ncbi.nlm.nih.gov/pubmed?term="Reynolds K"%5BAuthor%5D), et al. Mortality prediction with a single general self-rated health question. A meta-analysis. J Gen Intern Med. 2006;21:267-75.

- Desapriya E, Subzwari S, Sasges D, et al. Do light truck vehicles (LTV) impose greater risk of pedestrian injury than passenger cars? A meta-analysis and systematic review. [Traffic Inj Prev.](javascript:AL_get(this, 'jour', 'Traffic Inj Prev.');) 2010;11:48-56.
- Duncan MJ, Spence JC, Mummery WK. Perceived environment and physical activity: a meta-Analysis of selected environmental characteristics. Int J Behav Nutr Phys Act. 2005;2:11.

Egan M, Tannahill C, Petticrew M, et al. Psychosocial risk factors in home and community settings and their associations with population health and health inequalities: a systematic meta-review. BMC Public Health. 2008;8:239.

Elise EM, van Kempen M, Kruize H, et al. The association between noise exposure and blood pressure and ischemic heart disease: a meta-analysis. Environmental Health Perspectives. 2002;110.

- Frumkin H. Healthy places: exploring the evidence. American Journal of Public Health. 2003;93.

Giordano GN, Lindstrom M. The impacts of changes in different aspects of social capital and material conditions on self-rated health over time: a longitudinal cohort study. Soc Sci & Medicine. 2010;70:700-10.

- Jennings PA, Cameron P, Walker T, et al. Out-of-hospital cardiac arrest in Victoria: rural and urban outcomes. Med J Aust. 2006;185:135-9.
- [Kelaher M](http://www.ncbi.nlm.nih.gov/pubmed?term="Kelaher M"%5BAuthor%5D), [Warr DJ](http://www.ncbi.nlm.nih.gov/pubmed?term="Warr DJ"%5BAuthor%5D), [Feldman P](http://www.ncbi.nlm.nih.gov/pubmed?term="Feldman P"%5BAuthor%5D), [et](http://www.ncbi.nlm.nih.gov/pubmed?term="Tacticos T"%5BAuthor%5D) al. Living in 'Birdsville': exploring the impact of neighbourhood stigma on health. [Health Place](javascript:AL_get(this, 'jour', 'Health Place.');). 2010;16:381-8.

Lavin T, Higgins C, Metcalfe O, et al. Health effects of the built enviroment: a review. Dublin, Belfast: The Institute of Public Health in Ireland; 2006.

Leyden KM. Social capital and the built environment: the importance of walkable neighbourhoods. Am J Public Health. 2003;93:1546-51.

- Lorenc T, Brunton G, Oliver S, et al. Attitudes to walking and cycling among children, young people and parents: a systematic review. J Epidemiol Community Health. 2008;62:852-7.
- Morrison DS, Petticrew M, Thomson H. What are the most effective ways of improving population health through transport interventions? Evidence from systematic reviews. J Epidemiol Community Health. 2003;57:327-33.

Niemann H, Maschke C. Final report. Noise effects and morbidity. Copenhage: WHO; 2004.

# Parry J, Stevens A. Prospective health impact assessment: pitfalls, problems, and possible ways forward. BMJ. 2001;323:1177.

Pascoe EA, Smart Richman L. Perceived discrimination and health: a meta-analytic review. Psychol Bull. 2009;135:531-54.

- Passchier-Vermeer W, Passchier WF. Noise exposure and public health. Environ Health Perspect. 2000;108:123-31.

Payne M. Lead in drinking water. Canadian Medical Association Journal. 2008;179.

- Pell JP, Sirel JM, Marsden AK, et al. Effect of reducing ambulance response times on deaths from out of hospital cardiac arrest: cohort study. BMJ. 2001;322:1385-88.

Poortinga W, Dunstan FD, Fone DL. Perceptions of the neighbourhood environment and self rated health: a multilevel analysis of the Caerphilly Health and Social Needs Study. BMC Public Health. 2007;7:285.

- Public Health Advisory Committee (PHAC). Review on international evidence linking health and the urban built environment. Wellington: Public Health Advisory Committee; 2008.

Reiss R, Anderson EL, Cross CE, et al. Evidence of health impacts of sulfate-and nitrate-containing particles in ambient air. Inhal Toxicol. 2007;19:419-49.

Saelens B, Handy SL. Built environment correlates of walking: a review. Medicine & Science in Sport & Exercise. 2008;40:S550-6.

Schweitzer JH, Kim JW, Mackin JR. The impact of the built environment on crime and fear of crime in urban neighbourhoods. Journal of Urban Technology. 1996;3:59-73.

Schwela D. Air pollution and health in urban areas. Rev Environ Health. 2000;15:13-42.

Seeman TE. Social ties and health: the benefits of social integration. Ann Epidemiol. 1996;6:442-51.

Stephen A, Stansfeld M, Matheson P. Noise pollution: non-auditory effects on health. British Medical Bulletin. 2003;68:243-57.

- Sugiyama T, Leslie E, Giles-Corti B, et al. Associations of neighbourhood greenness with physical and mental health: do walking, social coherence and local social interaction explain the relationships? J Epidemiol Community Health. 2008;62:9.
- Sundquist J, Johasson SE, Yang M, et al. Low linking social capital as a predictor of coronary hearth disease in Sweden: a cohort study of 2.8 million people. Soc Sci & Medicine. 2006;62:954-63.
- Sundquist K, Lindström M, Malmström M, et al. Social participation and coronary hearth disease: a follow-up study of 6900 women and men in Sweden. Soc Sci & Medicine. 2004;38:615-22.
- Thomson H, Petticrew M. Is housing improvement a potential health improvement strategy? Copenhagen, WHO Regional Office for Europe (Health Evidence Network report); 2005.

**Etapas, métodos y procedimientos seguidos en el diseño y la aplicación de la evaluación del impacto en la salud sobre el Proyecto de Reurbanización de la Calle San Fernando de Alcalá de Guadaíra (Sevilla)**

| *Cribado* | |
| --- | --- |
| - Selección del proyecto a someter al pilotaje de evaluación del impacto en la salud | - Se seleccionó el proyecto de la calle San Fernando siguiendo criterios de relevancia, viabilidad y conveniencia |
| *Diseño y planificación* | |
| - Constitución del grupo director de la evaluación del impacto en la salud y establecimiento de los términos de referencia | - Se hizo un análisis preliminar de las medidas urbanísticas previstas y sus previsibles impactos para definir el alcance de la evaluación del impacto en la salud |
| *Identificación de impactos* | |
| - Caracterización de impactos asociados al proyecto y primer listado de recomendaciones | - Recopilación, análisis y síntesis de evidencia de estadísticas locales, evidencia publicada y consulta cualitativa a la población/agentes clave - Se identificaron impactos principales y se formularon 21 recomendaciones asociadas |
| *Informe final* | |
| - Redacción de un informe final de impactos y recomendaciones | • Se elaboró un listado final de 19 recomendaciones validadas en el grupo director |
| *Valoración de la evaluación del impacto en la salud* | |
| • Análisis del efecto de la evaluación del impacto en la salud en la toma de decisiones | • Se realizaron entrevistas con responsables y técnicos del Plan URBAN para valorar el grado de cumplimiento de las recomendaciones propuestas a los 18 meses de finalizar la evaluación del impacto en la salud |
